# Supplementary material for: Highly sensitive, stable, and precise detection of dopamine with carbon dots/tyrosinase hybrid as fluorescent probe
Source: Royal Society of Chemistry journal article supplement (doi:10.1039/c4ra06163b), 2014-01-01
Supplement: c4ra06163b1.pdf [file c4ra06163b1.pdf]

## High -sensitive, -stable, and -precision detection of dopamine with carbon dots/tyrosinase hybrid as fluorescent probes

### Supporting information

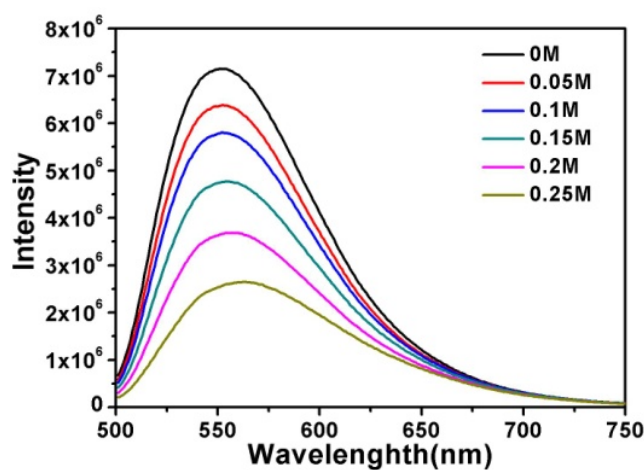

**Figure S1.** The fluorescence spectra of CDs about quenching addition of different concentrations of 2, 4-dinitrotoluene.
